# Supplementary material for: Acquisition of aneuploidy drives mutant p53-associated gain-of-function phenotypes
Source: PubMed Central journal article supplement (PMC8408227; doi:10.1038/s41467-021-25359-z), 2021-08-31
Supplement: 41467_2021_25359_MOESM2_ESM.pdf [file 41467_2021_25359_MOESM2_ESM.pdf]

## **Description of Additional Supplementary Files**

File Name: Supplementary Data 1

Description: Differential gene expression between MCF10A and CAL-51 mutant and null isogenic cell lines. Differentially expressed genes (False discovery rate adjusted  $P < 0.1$ , absolute  $\log_2fc \geq 1$ ) in MCF10A and CAL-51 R175H and R273H mutant compared to Null cells. Experiments were conducted at passage 30 (with and without doxorubicin treatment).
